# Supplementary material for: Identification of the First Highly Selective Inhibitor of Human Lactate Dehydrogenase B
Source: Research Square preprint supplement (doi:10.21203/rs.3.rs-95794/v1), 2020-11-09
Supplement: Supplementary file 1 [file 8bbfce619fa1826d33d806d0.pdf]

## **Supplementary Information**

### **Identification of the First Highly Selective inhibitor of Human Lactate**

#### **Dehydrogenase B**

Sachio Shibata<sup>1+\*</sup>, Satoshi Sogabe<sup>1#</sup>, Masanori Miwa<sup>1</sup>, Takuya Fujimoto<sup>2</sup>, Nobuyuki Takakura<sup>2</sup>, Akihiko Naotsuka<sup>1</sup>, Shuji Kitamura<sup>2</sup>, Tomohiro Kawamoto<sup>1\*</sup>, and Tomoyoshi Soga<sup>3</sup>

Supplemental Data includes:

Supplementary Figure 1. Linearity of MS-based NADH and NAD<sup>+</sup> detection.

Supplementary Figure 2. Determination of LDHB and LDHA assay conditions.

Supplementary Figure 3. Nonlinear fits of the Michaelis–Menten kinetics for LDHB in the presence of AXKO-0046.

Supplementary Figure 4. Time-dependency inhibition of LDHB activity by AXKO-0046.

Supplementary Figure 5. The Fobs–Fcalc electron density omit maps of the quarterly complex contoured at 3 $\sigma$

Supplementary Figure 6. Superposition of eight monomers in the asymmetric unit of the LDHB/NADH complex.

Supplementary Figure 7. Comparison of the root-mean-square deviation values per amino-acid residue of LDHB between the two complexes.

Supplementary Figure 8. Sequence alignment of human LDHA and human LDHB.

Supplementary Figure 9. Structural comparison between the allosteric site of LDHB and that of LDHA (PDB code 4OKN).

Supplementary Table 1. Selectivity profile of the LDHB hit compound.

Supplementary Table 2. Inhibitory activity of LDHB by AXKO-0046 at varying concentrations of NADH and pyruvate.

Supplementary Table 3. Data collection and refinement statistics.

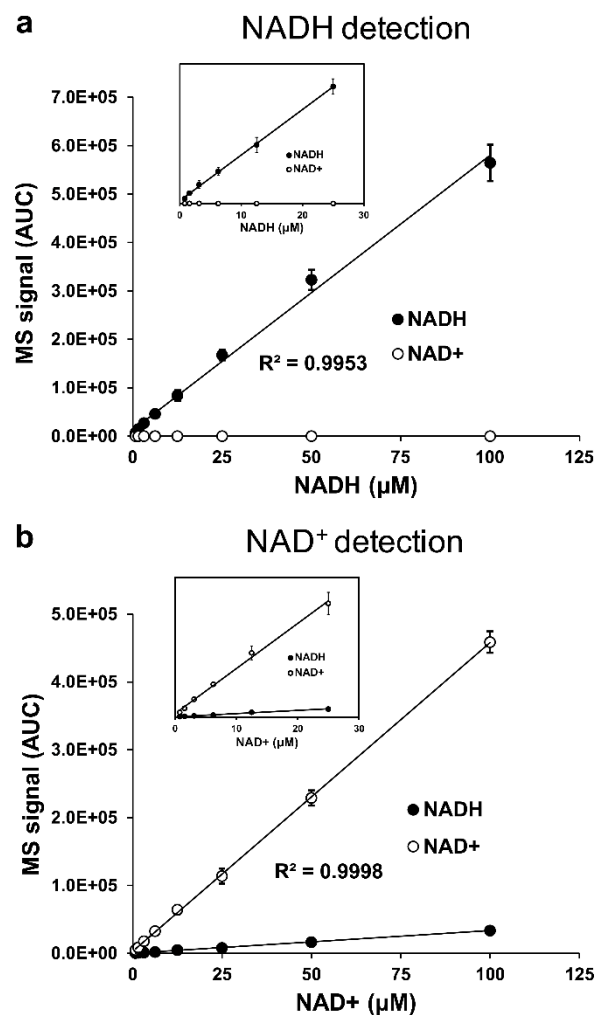

**Supplementary Figure 1. Linearity of MS-based NADH and NAD<sup>+</sup> detection.**

Linearity were detected up to 100  $\mu\text{M}$  NADH, **a** (closed circles) and NAD<sup>+</sup>, **b** (open circles) with a limit of detection at 0.78  $\mu\text{M}$  using the RF-MS assay. Linearity is shown as insets for lower concentrations of the analytes. Data shown are mean  $\pm$  standard deviation (SD) ( $n=4$ ).

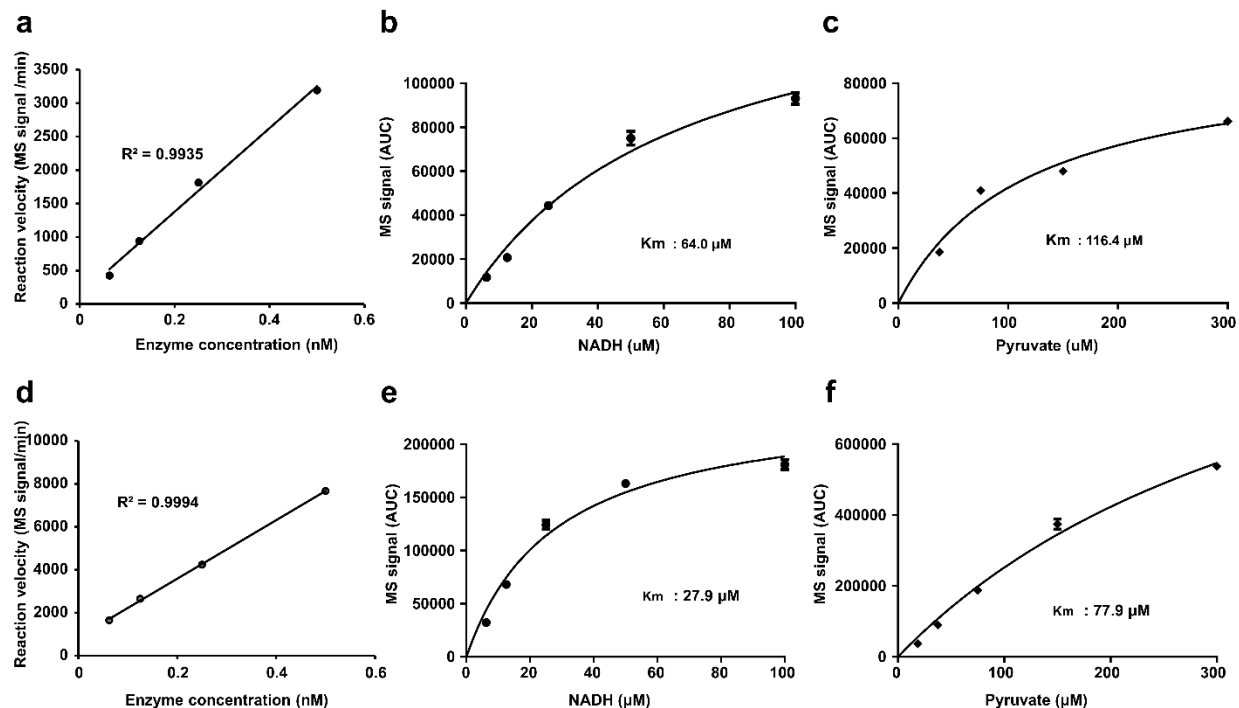

## Supplementary Figure 2. Determination of LDHB and LDHA assay conditions.

**a, d** Initial velocities for LDHB with pyruvate (75  $\mu$ M) and NADH (75  $\mu$ M) determined using RapidFire MS. The LDHB or LDHA reaction (0.0625 to 0.5 nM) showed good linearity up to 20 min. The assay was performed with pyruvate (500  $\mu$ M) and increasing concentrations of NADH, **b, e** or NADH (500  $\mu$ M) and increasing concentrations of pyruvate **c, f**. Data were fitted to the Michaelis–Menten equations to obtain kinetic constants  $K_m$  using GraphPad Prism. Data are shown as the mean  $\pm$  standard deviation (SD) ( $n=4$ ).

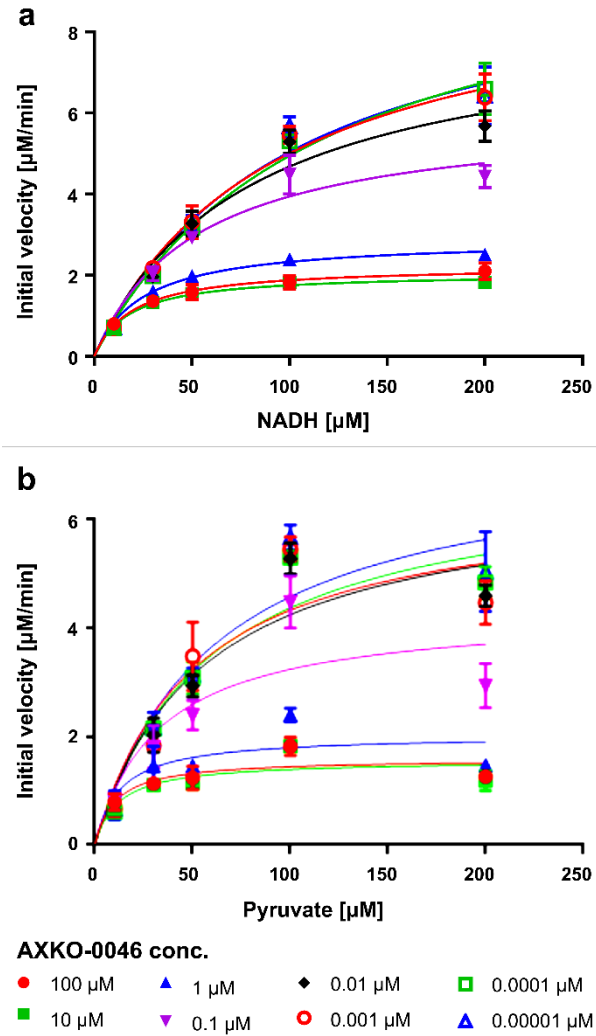

**Supplementary Figure 3. Nonlinear fits of the Michaelis–Menten kinetics for LDHB in the presence of AXKO-0046.** Michaelis-Menten Kinetics for LDHB were determined from the initial reaction velocities of **a** NADH and **b** pyruvate of varying substrate concentrations in the presence of the indicated concentration of AXKO-0046

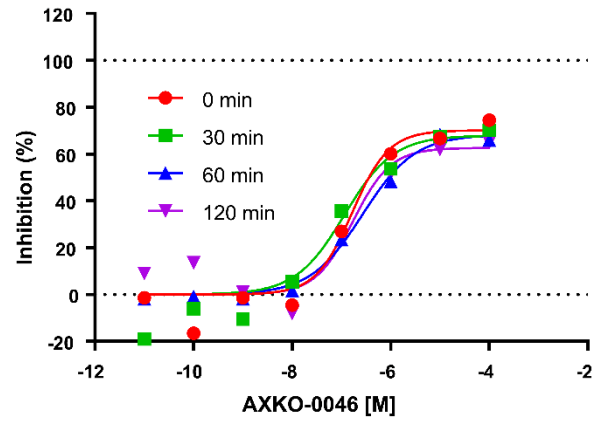

**Supplementary Figure 4. Time-dependency inhibition of LDHB activity by AXKO-0046.** Time dependency inhibition was measured by preincubating AXKO-0046 and LDHB for 0, 30, 60 or 120 min as indicated before initiating the LDHB reaction. Data are shown as the mean ( $n=2$ ).

**a**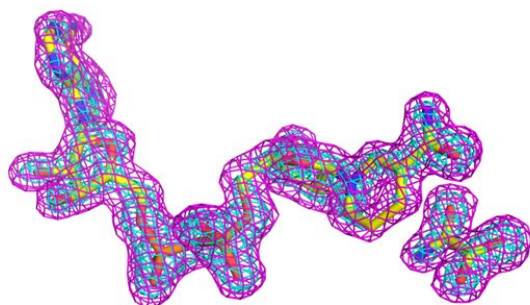**b**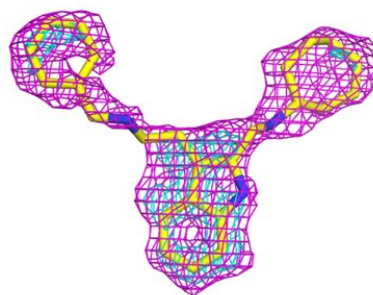

**Supplementary Figure 5. The  $F_{\text{obs}} - F_{\text{calc}}$  electron density omit maps of the quarterly complex contoured at  $3\sigma$ : a NADH and oxamate and b AXKO-0046.**

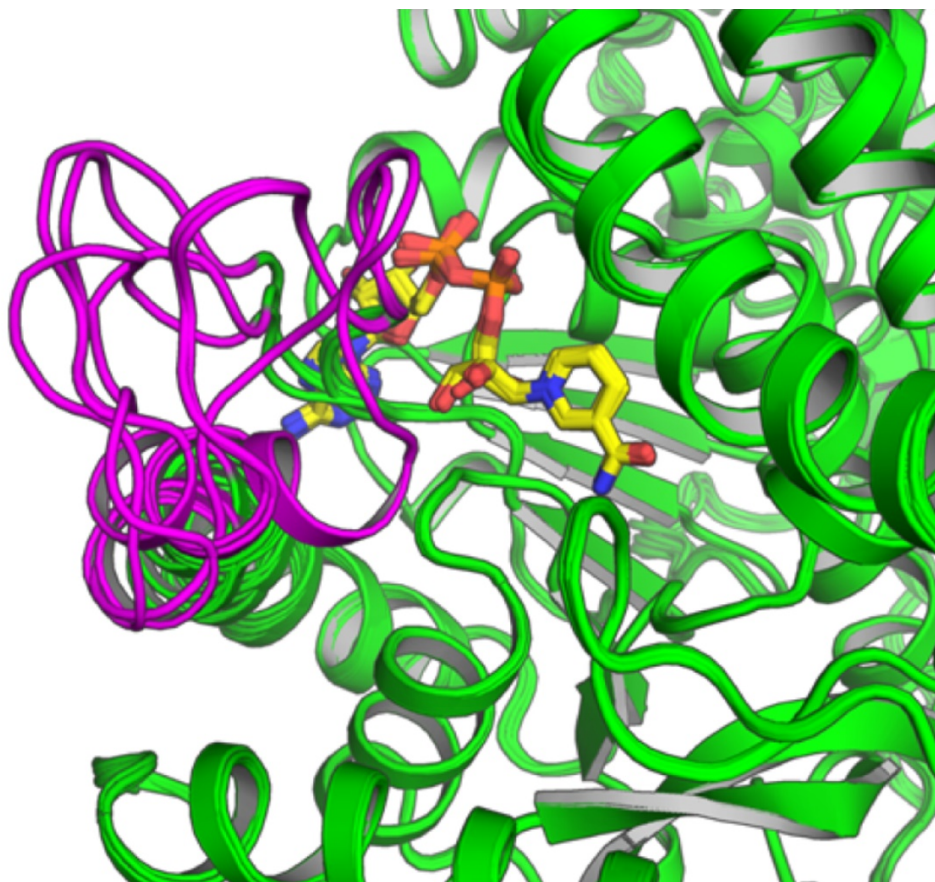

**Supplementary Figure 6. Superposition of eight monomers in the asymmetric unit of the LDHB/NADH complex.** The active-site loop (residues Glu101–Leu110) is in magenta.



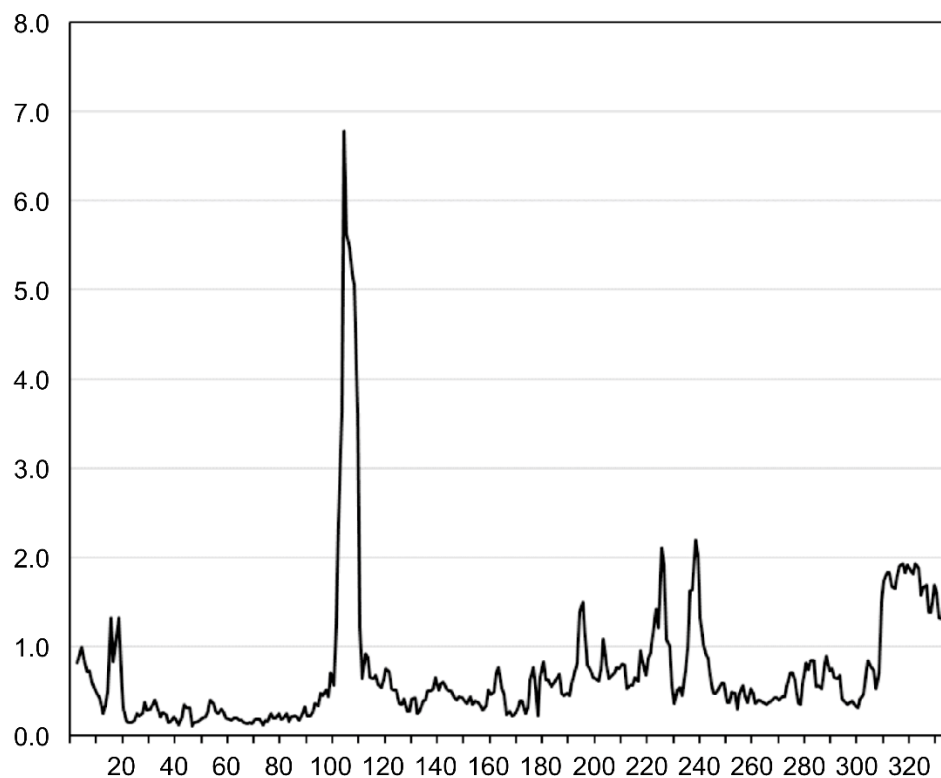

**Supplementary Figure 7. Comparison of the root-mean-square deviation values per amino-acid residue of LDHB between the two complexes.** RMSD was calculated from the sets of aligned conformations.

|      |     |           |       |         |        |          |       |        |       |      |        |        |       |        |        |       |     |       |     |
|------|-----|-----------|-------|---------|--------|----------|-------|--------|-------|------|--------|--------|-------|--------|--------|-------|-----|-------|-----|
| LDHA | 1   | MATLK     | DQLIY | NLLKEEQ | T-P    | QNKITVVG | VG    | AVGMA  | CAISI | LMKD | LADELA | LVDVI  | EDK   | LK     | 59     |       |     |       |     |
| LDHB | 1   | MATLK     | EKLIA | PVAEE   | EATVP  | NNKITVVG | VG    | QVGMA  | CAISI | LGKS | LADELA | LVDVL  | EDK   | LK     | 60     |       |     |       |     |
| LDHA | 60  | GEMMDLQHG | S     | LFLR    | TPKIV  | S        | GKDY  | NVTANS | KLVI  | I    | TAGAR  | QQEGES | RNLN  | VQRNV  | NI     | FKF   | 119 |       |     |
| LDHB | 61  | GEMMDLQHG | S     | LFLQ    | TPKIV  | A        | DKDY  | S      | V     | TANS | KI     | VVV    | TAGVR | QQEGES | RNLN   | VQRNV | NV  | FKF   | 120 |
| LDHA | 120 | IIPNV     | VKYSP | NCKLLI  | VSNP   | VDILTY   | V     | AWK    | ISGF  | P    | KNRVI  | GSGCN  | LDSAR | FRYLM  | G      | ER    | LG  | 179   |     |
| LDHB | 121 | IIPQI     | VKYSP | DCIII   | VSNP   | VDILTY   | V     | TWK    | LSGL  | P    | KHRVI  | GSGCN  | LDSAR | FRYLM  | A      | E     | LG  | 180   |     |
| LDHA | 180 | VHPL      | SCHGW | V       | LGEHGD | SSVP     | VWSGM | NVAGV  | SLKT  | L    | HPDLG  | TDKDK  | EQWKE | VHKQ   | V      | VESAY | 239 |       |     |
| LDHB | 181 | IHP       | SCHGW | I       | LGEHGD | SSVA     | VW    | SGV    | NVAGV | SLQ  | L      | NPEMG  | TDNDS | E      | NWKE   | VHKM  | V   | VESAY | 240 |
| LDHA | 240 | EVIKL     | KGYTS | WAIGLS  | VADL   | AESIM    | KNLR  | R      | VHPV  | STM  | IKG    | LYGI   | KDDV  | FL     | SVPCIL | GQNG  | 299 |       |     |
| LDHB | 241 | EVIKL     | KGYTN | WAIGLS  | VADL   | IESML    | KNLSR | I      | HPV   | STM  | VKG    | MYGI   | E     | NEVFL  | SLPCIL | NARG  | 300 |       |     |
| LDHA | 300 | ISDLV     | KVT   | L       | T      | SEEE     | AR    | LKKS   | ADTLW | G    | IQKE   | LQ     | -     | F      |        |       | 332 |       |     |
| LDHB | 301 | LTSV      | INQ   | K       | L      | K        | D     | DEVA   | Q     | LKKS | ADTLW  | D      | I     | QKD    | L      | KDL   | 334 |       |     |

## Supplementary Figure 8. Sequence alignment of human LDHA and human LDHB.

Residues depicted in Figure 5b are in red.

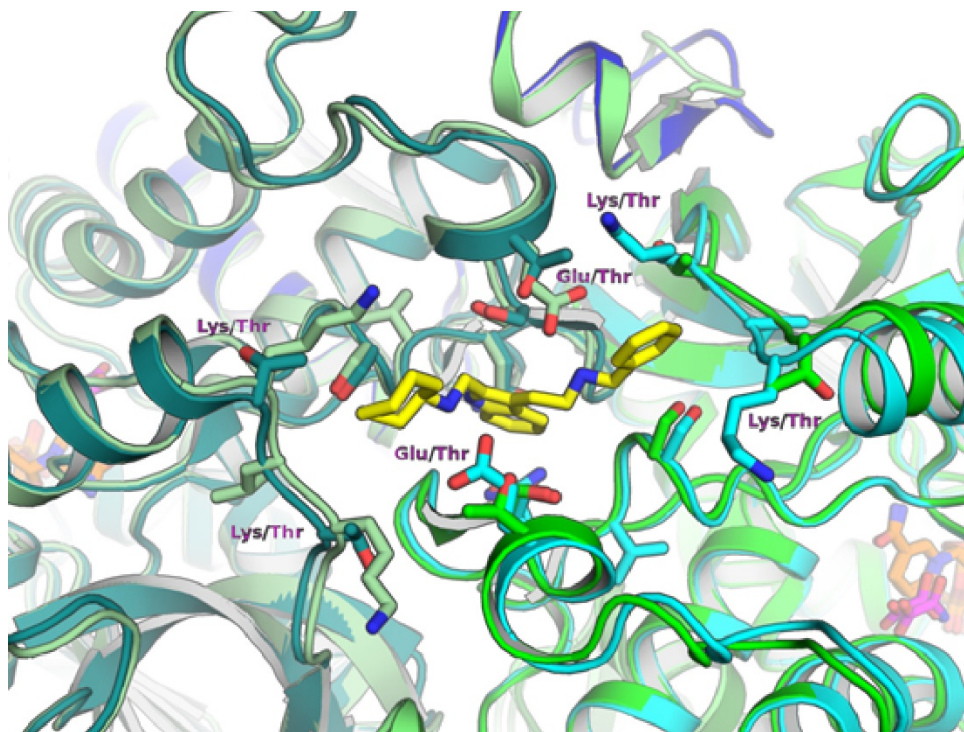

**Supplementary Figure 9. Structural comparison between the allosteric site of LDHB and that of LDHA (PDB code 4OKN). Amino acid differences of both enzymes are labelled.**

**Supplementary Table 1. Selectivity profile of the LDHB hit compound.**

| ID        | Deconvolution<br>assay<br>(% inhibition at 30<br>μM) | LDHB<br>(IC <sub>50</sub> , μM) | LDHA<br>(IC <sub>50</sub> , μM) | Ratio<br>(LDHA (IC <sub>50</sub> )<br>/LDHB (IC <sub>50</sub> )) |
|-----------|------------------------------------------------------|---------------------------------|---------------------------------|------------------------------------------------------------------|
| AXKO-0001 | 50                                                   | 23                              | 12                              | 0.5                                                              |
| AXKO-0002 | 95                                                   | 5.6                             | <3                              | <0.5                                                             |
| AXKO-0003 | 50                                                   | 33                              | 71                              | 2.2                                                              |
| AXKO-0004 | 45                                                   | 15                              | >300                            | 20.0                                                             |
| AXKO-0005 | 38                                                   | 32                              | 34                              | 1.1                                                              |
| AXKO-0006 | 37                                                   | 30                              | 6.4                             | 0.21                                                             |
| AXKO-0007 | 40                                                   | 38                              | 28                              | 0.7                                                              |
| AXKO-0008 | 53                                                   | 16                              | 130                             | 8.1                                                              |
| AXKO-0009 | 54                                                   | 21                              | 39                              | 1.9                                                              |
| AXKO-0010 | 44                                                   | <3                              | >300                            | >100                                                             |
| AXKO-0011 | 59                                                   | 17                              | 22                              | 1.3                                                              |
| AXKO-0012 | 53                                                   | 8.1                             | 6.8                             | 0.8                                                              |
| AXKO-0013 | 84                                                   | 5.5                             | 30                              | 5.5                                                              |
| AXKO-0014 | 67                                                   | 15                              | 77                              | 5.1                                                              |
| AXKO-0015 | 51                                                   | 30                              | 130                             | 4.3                                                              |
| AXKO-0016 | 55                                                   | 13                              | 19                              | 1.5                                                              |
| AXKO-0017 | 60                                                   | 22                              | 24                              | 1.1                                                              |
| AXKO-0018 | 92                                                   | 6.7                             | <3                              | <0.4                                                             |
| AXKO-0019 | 49                                                   | 27                              | 36                              | 1.3                                                              |
| AXKO-0020 | 78                                                   | 9.5                             | 22                              | 2.3                                                              |
| AXKO-0021 | 53                                                   | 20                              | 63                              | 3.2                                                              |
| AXKO-0022 | 34                                                   | 15                              | 39                              | 3.2                                                              |

**Supplementary Table 2. Inhibitory activity of LDHB by AXKO-0046 at varying concentrations of NADH and pyruvate.**

|                       | NADH (μM)     |       |       |       |      |
|-----------------------|---------------|-------|-------|-------|------|
|                       | 10            | 30    | 50    | 100   | 200  |
| IC <sub>50</sub> (nM) | N.D.          | 702.1 | 329.5 | 223.0 | 94.2 |
|                       | Pyruvate (μM) |       |       |       |      |
|                       | 10            | 30    | 50    | 100   | 200  |
| IC <sub>50</sub> (nM) | N.D.          | 197.1 | 114.2 | 223.0 | 96.3 |

**Supplementary Table 3. Data collection and refinement statistics.**

|                                                                        | LDHB/NADH/oxamate/AXKO-0046         | LDHB/NADH                            |
|------------------------------------------------------------------------|-------------------------------------|--------------------------------------|
| <b>Data collection</b>                                                 |                                     |                                      |
| Space group                                                            | <i>P</i> 2 <sub>1</sub>             | <i>C</i> 2                           |
| Unit cell dimensions<br>a, b, c (Å), $\alpha$ , $\beta$ , $\gamma$ (°) | 59.4, 137.6, 84.9,<br>90, 109.3, 90 | 232.5, 84.2, 156.2,<br>90, 120.8, 90 |
| Resolution (Å)                                                         | 50-1.55 (1.58-1.55)                 | 50-1.80 (1.83-1.80)                  |
| Redundancy                                                             | 4.1 (3.5)                           | 3.4 (3.4)                            |
| Completeness (%)                                                       | 99.2 (93.8)                         | 99.6 (100.0)                         |
| <i>I</i> / $\sigma$                                                    | 20.3 (4.0)                          | 19.8 (2.1)                           |
| <i>R</i> <sub>sym</sub>                                                | 0.076 (0.251)                       | 0.065 (0.511)                        |
| <i>CC</i> <sub>1/2</sub>                                               | 0.989 (0.923)                       | 0.994 (0.736)                        |
| <b>Refinement</b>                                                      |                                     |                                      |
| Resolution (Å)                                                         | 50-1.55 (1.58-1.55)                 | 50-1.80 (1.85-1.80)                  |
| No. reflections                                                        | 174218 (12517)                      | 225765 (17284)                       |
| <i>R</i> <sub>work</sub> / <i>R</i> <sub>free</sub>                    | 0.170 (0.204) / 0.192 (0.233)       | 0.170 (0.238) / 0.203 (0.269)        |
| No. atoms<br>Protein / Ligand / Water                                  | 10253 / 284 / 765                   | 20488 / 484 / 977                    |
| B-factors (Å <sup>2</sup> )<br>Protein / Ligand / Ion / Water          | 25.2 / 28.7 / 32.5                  | 31.5 / 31.0 / 32.4                   |
| Rms deviation from ideal geometry<br>Bond lengths (Å) / angles (°)     | 0.011 / 1.549                       | 0.010 / 1.548                        |
| Ramachandran plot<br>Preferred / Allowed / Outliers (%)                | 96.1 / 3.2 / 0.7                    | 94.7 / 4.6 / 0.7                     |
| <b>PDB code</b>                                                        | 7DBJ                                | 7DBK                                 |

Values in parentheses indicate the highest-resolution shell.
